# Supplementary material for: The Tardigrade Damage Suppressor Protein Promotes Transcription Factor Activation and Expression of DNA Repair Genes in Human Cells in Response to Hydroxyl Radicals and UV-C Exposure
Source: Preprints.org preprint supplement (doi:10.20944/preprints202107.0333.v1), 2021-07-14
Supplement: Supplementary file 3 [file supplementary]

**Supplementary Figures**

**Figure S1**

**
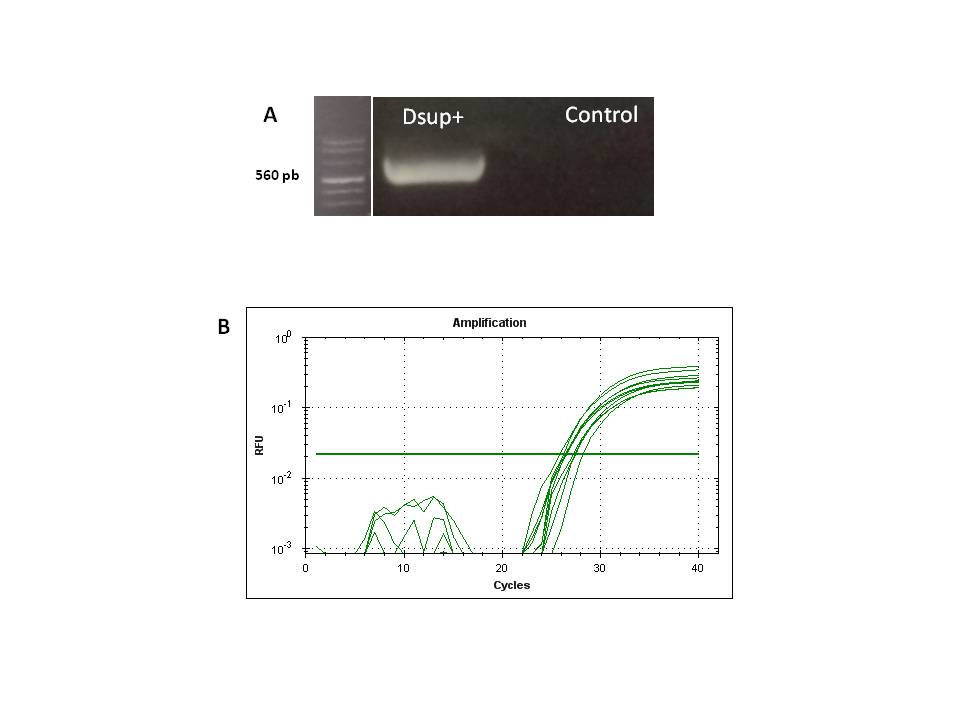
**

**Supplementary Figure 1.** A) Agarose gel showing Dsup expression in transfected cells compared to untransfected HEK293. B) Real time RT-PCR at 2, 5, 7 and 9 days after stabilization of the transfection.

**Figure S2**


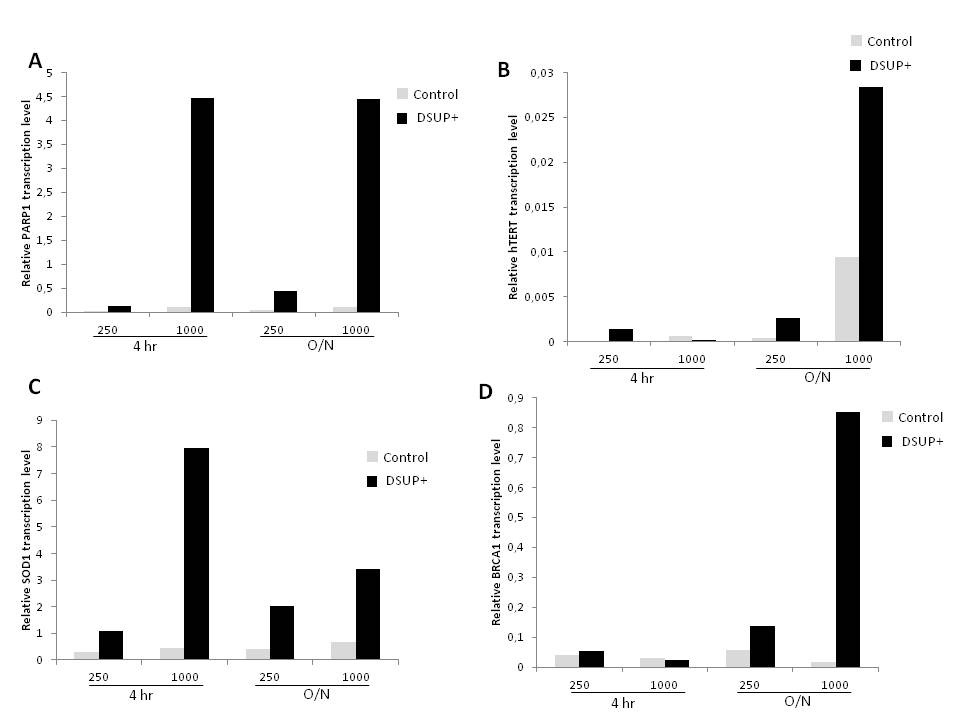


**Supplementary Figure 2.** Graphic showing relative expression of selected genes after H2O2 (250 and 1000 µM) treatment. Both 4 hr and O/N results are presented for A) PARP1, B) hTERT, C) SOD1, and D) BRCA1 genes.

**Figure S3**


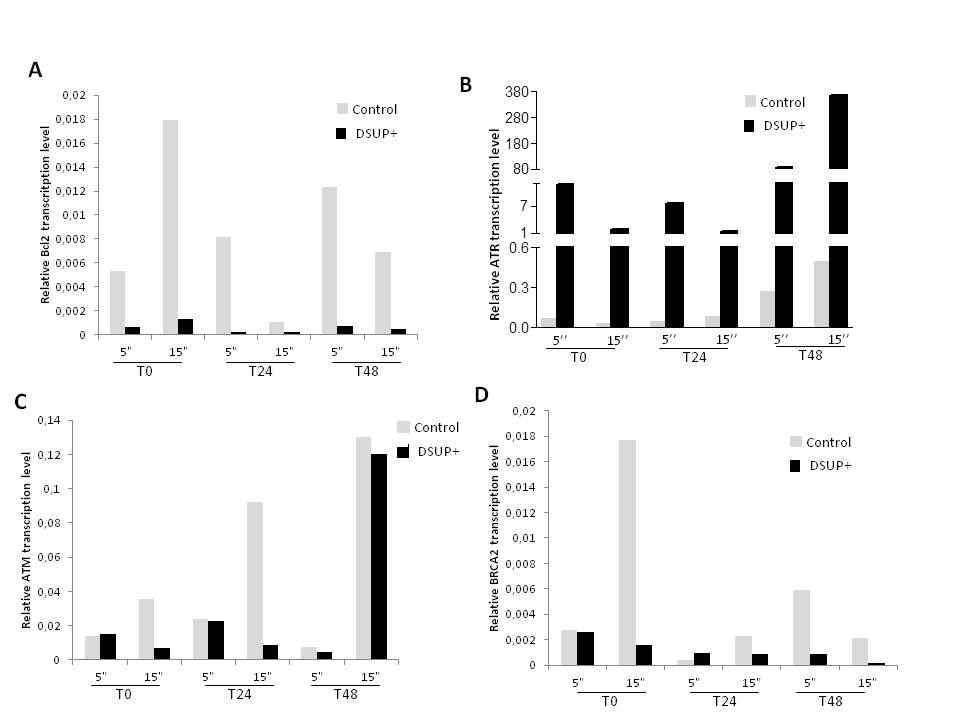


**Supplementary Figure 3.** Graphic showing relative expression of selected genes after 5'' or 15'' of UV-C exposure. Results are presented immediately after irradiation (T0) and after 24 or 48 hr of recovery for A) Bcl2, B) ATR, C) ATM, and D) BRCA2 genes.
